# Supplementary material for: Stimuli Responsive and Antimicrobial Cellulose-Chitosan Hydrogels Containing Polydiacetylene Nanosheets
Source: Preprints.org preprint supplement (doi:10.20944/preprints202301.0450.v1), 2023-01-25
Supplement: Supplementary file 3 [file supplementary]

Supplementary file PDA-CMCs-HEC hydrogels

Figure S1: Swelling factor as a function of HEC content

Figure S2: IR spectra of (a) chitosan (CS) and (b) carboxymethyl chitosan (RCOOH)

Figure S3: IR spectra of hydrogels prepared by crosslinking different ratios of HEC

Figure S4: IR spectra of (a) PDA and (b) PDA-ZnO NPs

Figure S5: X-ray diffractogram of CS, HEC and CMCs-HEC

Figure S6: X-ray diffractogram of citric acid


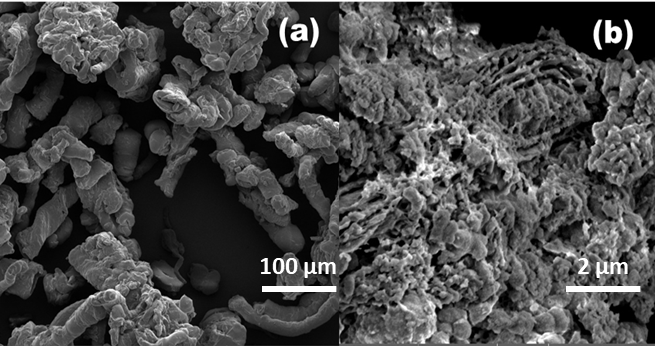


Figure S7: SEM Micrographs of (a) HEC and (b) CMCsNa


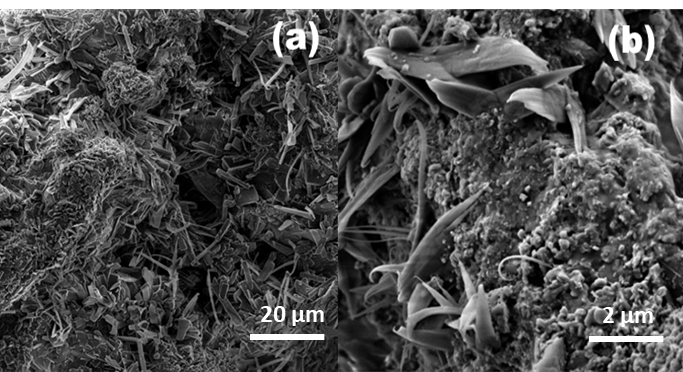


Figure S8: SEM Micrographs of PDA nanosheets on PDA-CMCs-ZnO-HEC


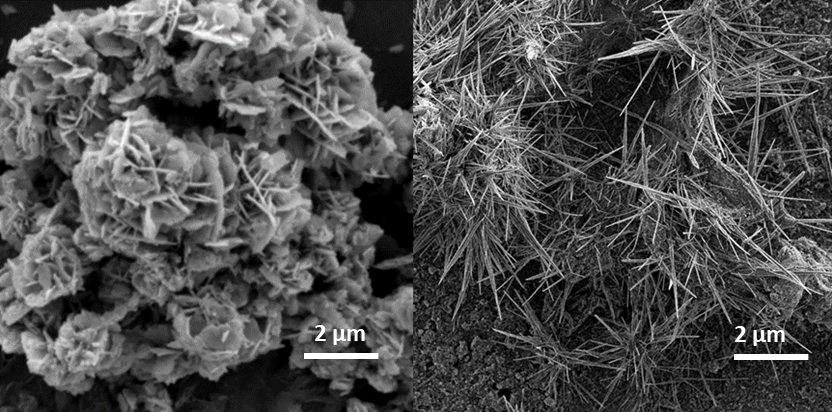


Figure S9: SEM micrographs of ZnO nanorods on PDA-ZnO-CMCs-HEC


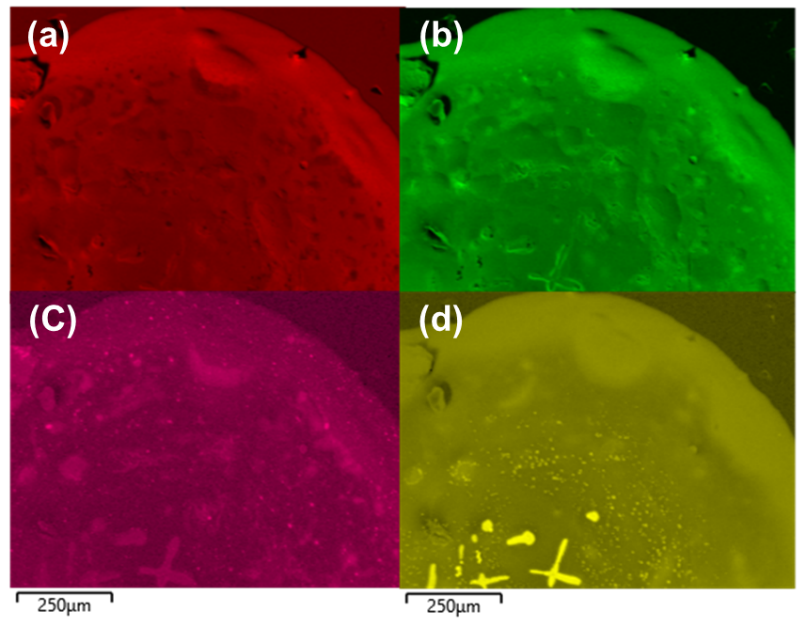


Figure S10: Elemental mapping showing (a) carbon (b) oxygen (c) zinc (d) chlorine

Figure S11 MIC of composite hydrogels without PDA-ZnO against *E. coli*.

Figure S12: MIC of composite hydrogels with PDA-ZnO against *E. coli*.
